# Supplementary material
Source: Springer Nature journal article supplement (https://www.springermedizin.de/resource/supplementary/12889_2013_6191_MOESM1_ESM.pdf/9498960)

OUTCOME GETTING WORSE →

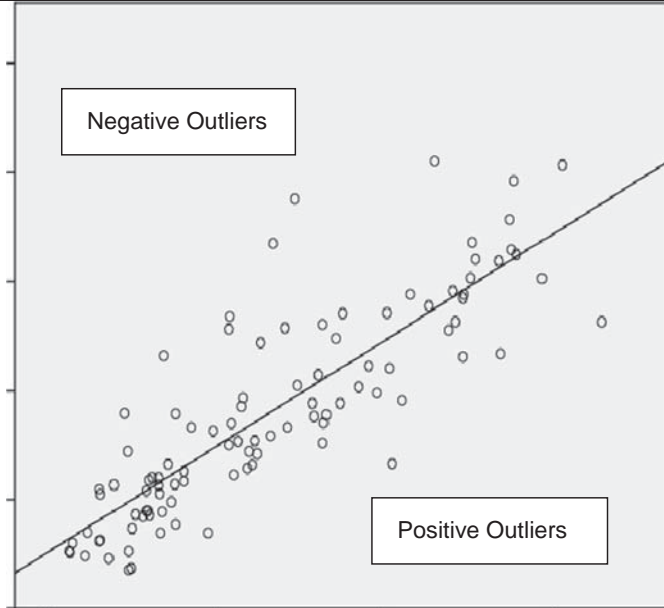

STRESS INCREASING →

Adapted from Robinson and Platts-Fowler (2013) p. 14.

Supplement: MOESM1 [file 9498960]
